# Supplementary material for: Three resorcin[4]arene-based complexes with Cu(ii)-exchange characteristics and fluorescence sensing of polyoxometalates in aqueous solutions
Source: Royal Society of Chemistry journal article supplement (doi:10.1039/c4ce01376j), 2014-09-08
Supplement: c4ce01376j1.pdf [file c4ce01376j1.pdf]

## Electronic supplementary information

### Three resorcin[4]arene-based complexes with Cu(II)-exchange characters and fluorescence sensing POM in aqueous solution

Wei Jiang,<sup>a</sup> Hang Zhang,<sup>a</sup> Jin Yang,<sup>\*,a</sup> Ying-Ying Liu,<sup>a</sup> Hai-Yan Liu,<sup>b</sup> and Jian-Fang Ma<sup>\*,a</sup>

<sup>a</sup> Key Lab of Polyoxometalate Science, Department of Chemistry, Northeast Normal University, Changchun 130024, P. R. China

<sup>b</sup> Department of Chemistry and Pharmaceutical Engineering, Suihua University, Suihua 152061, People's Republic of China

#### Experimental section

The ligand H<sub>4</sub>L was prepared by reported procedures.<sup>1,2</sup> All the reagents and solvents for synthesis were purchased from commercial sources and used without further purify.

**Physical measurements.** The FT-IR spectra were recorded from KBr pellets in the range 4000–400 cm<sup>-1</sup> on a Mattson Alpha-Centauri spectrometer. Microanalyses of C, H, and N for the compounds were obtained using a Perkin–Elmer 2400CHN elemental analyzer. The powder X-ray diffraction (PXRD) patterns of the samples were collected on a Rigaku Dmax 2000 X-ray diffractometer with graphite monochromatized Cu K<sub>α</sub> radiation ( $\lambda = 0.154$  nm) and  $2\theta$  ranging from 5 to 50° at room temperature. Thermogravimetric analyses were performed on a Perkin-Elmer TG-7 analyzer heated from room temperature to 600°C under nitrogen gas. Inductively coupled plasma (ICP) analysis was performed on a Leeman Labs Prodigy inductively coupled plasma-optical atomic emission spectrometer (ICP-AES). The photoluminescent property was measured on a FLSP920 Edinburgh Fluorescence Spectrometer at room temperature.

**Synthesis of [Cd<sub>3</sub>L(H<sub>2</sub>L)(H<sub>2</sub>O)]·2DMF·11.5H<sub>2</sub>O (1):** A mixture of H<sub>4</sub>L (0.028 g, 0.03

mmol), Cd(CH<sub>3</sub>COO)<sub>2</sub>·2H<sub>2</sub>O (0.016 g, 0.06 mmol), DMF (4 mL) and H<sub>2</sub>O (4 mL) was placed in a Teflon reactor (15 mL). The mixture was heated at 110 °C for 3 days and then cooled to room temperature gradually. Pale yellow colorless crystals were obtained in a 41% yield. Anal. calcd for C<sub>102</sub>H<sub>131</sub>O<sub>47.5</sub>N<sub>2</sub>Cd<sub>3</sub> (*Mr* = 2482.35): C, 49.35; H, 5.32; N, 1.13. Found: C, 49.81; H, 5.43; N, 1.10. IR data (KBr, cm<sup>-1</sup>): 3648(w), 3422(m), 2930(w), 1664(s), 1556(s), 1457(m), 1429(s), 1332(w), 1302(w), 1239(w), 1152(w), 1087(m), 1020(w), 976(s), 925(w), 786(w), 735(w), 680(w), 666(w), 588(w), 502(w).

**Synthesis of [Zn<sub>4</sub>L<sub>2</sub>(H<sub>2</sub>O)<sub>4</sub>]·2DMF·10H<sub>2</sub>O (2):** The mixture of H<sub>4</sub>L (0.028 g, 0.03 mmol), Zn(CH<sub>3</sub>COO)<sub>2</sub>·2H<sub>2</sub>O (0.013 g, 0.06 mmol), DMF (4 mL), and H<sub>2</sub>O (4 mL) was placed in a Teflon reactor (15 mL) and heated at 100 °C for 3 days. Then it was gradually cooled to room temperature. Pale yellow crystals were harvest in a 44% yield. Anal. calcd for C<sub>102</sub>H<sub>130</sub>O<sub>48</sub>N<sub>2</sub>Zn<sub>4</sub> (*Mr* = 2413.74): C, 50.75; H, 5.43; N, 1.16. Found: C, 50.41; H, 5.51; N, 1.20. IR data (KBr, cm<sup>-1</sup>): 3422(m), 2929(m), 1663(s), 1548(s), 1507(m), 1457(s), 1429(s), 1337(w), 1302(m), 1242(m), 1152(w), 1086(s), 1019(m), 976(s), 810(w), 787(w), 738(w), 682(w), 665(w), 588(w), 498(w).

**Synthesis of [Mn<sub>9</sub>L<sub>4</sub>(HCOO)<sub>2</sub>(H<sub>2</sub>O)<sub>12</sub>(DMF)<sub>2</sub>]·2DMF·10H<sub>2</sub>O (3):** The preparation of **3** was similar to that of **2** except that Mn(CH<sub>3</sub>COO)<sub>2</sub>·2H<sub>2</sub>O (0.016 g) was utilized in place of Zn(CH<sub>3</sub>COO)<sub>2</sub>·2H<sub>2</sub>O. Pale yellow crystal products were isolated in a 35% yield. Anal. calcd for C<sub>206</sub>H<sub>250</sub>O<sub>94</sub>N<sub>4</sub>Mn<sub>9</sub> (*Mr* = 4780.60): C, 51.76; H, 5.27; N, 1.17. Found: C, 51.40; H, 5.45; N, 1.23. IR data (KBr, cm<sup>-1</sup>): 3410(m), 2927(m), 1685(m), 1659(s), 1554(s), 1459(s), 1427(s), 1362(m), 1334(m), 1300(m), 1239(m), 1205(w), 1151(w), 1086(s), 1020(m), 974(s), 806(w), 785(w), 681(w), 641(w), 586(w), 499(w).

### X-ray crystallography

An Oxford Diffraction Gemini R CCD with graphite-monochromated Mo-K $\alpha$  radiation for compounds **1** and **3** ( $\lambda$  = 0.071 nm) and Cu-K $\alpha$  radiation for compound **2** ( $\lambda$  = 0.154 nm) was used to collect single-crystal X-ray diffraction data at 293 K. A multiscan technique was used to perform absorption corrections. The structures were solved by the direct method.<sup>3</sup> The full-matrix least squares techniques using the SHELXL-97 program within WINGX were used to refine all non-hydrogen atoms. In **1**, Cd<sub>2</sub> is split over two sites with the total of occupancy of 0.5. The free water molecules (O2W, O4W, O5W, O6W, O7W, O8W, O9W and O10W) are

disordered by symmetry. For **2**, the guest solvent atoms could not be resolved by point atom observations due to disorder. Hence, the PLATON squeeze procedure was performed. For **3**, Zn2, Zn3, O3W, O9 and O16 atoms are split over two sites with the total of occupancy of 1, respectively.

## References

- 1 L. Pirondini, D. Bonifazi, E. Menozzi, E. Wegelius, K. Rissanen, C. Massera and E. Dalcanale, *Eur. J. Org. Chem.*, 2001, **12**, 2311.
- 2 A. G. Millar, A. C. Oehlschlager and J. W. Wong, *J. Org. Chem.*, 1983, **48**, 4404.
- 3 (a) G. M. Sheldrick, *SHELXS-97, Programs for X-ray Crystal Structure Solution*; University of Göttingen: Göttingen, Germany, 1997; (b) G. M. Sheldrick, *SHELXL-97, Programs for X-ray Crystal Structure Refinement*; University of Göttingen: Göttingen, Germany, 1997; (c) L. J. Farrugia, *WINGX, A Windows Program for Crystal Structure Analysis*, University of Glasgow, Glasgow, UK, 1988.

**Table S1** Selected bond distances (Å) and angles (°) for **1**.

|                                |          |                                |          |
|--------------------------------|----------|--------------------------------|----------|
| Cd(1)-O(1)                     | 2.212(1) | Cd(1)-O(1W)                    | 2.289(3) |
| Cd(1)-O(5)                     | 2.342(1) | Cd(1)-O(7) <sup>#1</sup>       | 2.364(1) |
| Cd(1)-O(3)                     | 2.387(1) | Cd(1)-O(6)                     | 2.397(1) |
| Cd(1)-O(2)                     | 2.629(1) | Cd(2)-O(3) <sup>#2</sup>       | 2.146(1) |
| Cd(2)-O(3)                     | 2.146(1) | Cd(2)-O(5)                     | 2.386(1) |
| Cd(2)-O(5) <sup>#2</sup>       | 2.386(1) | Cd(2)-O(4) <sup>#2</sup>       | 2.569(1) |
| Cd(2)-O(4)                     | 2.569(1) | O(1)-Cd(1)-O(1W)               | 86.7(6)  |
| O(1)-Cd(1)-O(5)                | 163.7(5) | O(1W)-Cd(1)-O(5)               | 82.1(6)  |
| O(1)-Cd(1)-O(7) <sup>#1</sup>  | 103.0(5) | O(1W)-Cd(1)-O(7) <sup>#1</sup> | 170.3(6) |
| O(5)-Cd(1)-O(7) <sup>#1</sup>  | 88.2(6)  | O(1)-Cd(1)-O(3)                | 98.4(4)  |
| O(1W)-Cd(1)-O(3)               | 96.1(9)  | O(5)-Cd(1)-O(3)                | 71.2(5)  |
| O(7) <sup>#1</sup> -Cd(1)-O(3) | 81.9(8)  | O(1)-Cd(1)-O(6)                | 138.6(4) |
| O(1W)-Cd(1)-O(6)               | 87.9(7)  | O(5)-Cd(1)-O(6)                | 53.0(5)  |
| O(7) <sup>#1</sup> -Cd(1)-O(6) | 85.2(6)  | O(3)-Cd(1)-O(6)                | 123.0(4) |

|                                              |          |                                              |          |
|----------------------------------------------|----------|----------------------------------------------|----------|
| O(1)-Cd(1)-O(2)                              | 53.0(4)  | O(1W)-Cd(1)-O(2)                             | 92.8(8)  |
| O(5)-Cd(1)-O(2)                              | 139.1(5) | O(7) <sup>#1</sup> -Cd(1)-O(2)               | 93.6(7)  |
| O(3)-Cd(1)-O(2)                              | 149.5(4) | O(6)-Cd(1)-O(2)                              | 86.4(4)  |
| O(3) <sup>#2</sup> -Cd(2)-O(3)               | 173.1(1) | O(3) <sup>#2</sup> -Cd(2)-O(5)               | 101.5(6) |
| O(3)-Cd(2)-O(5)                              | 74.6(5)  | O(5)-Cd(2)-O(5) <sup>#2</sup>                | 113.7(8) |
| O(3) <sup>#2</sup> -Cd(2)-O(4) <sup>#2</sup> | 51.7(6)  | O(3)-Cd(2)-O(4) <sup>#2</sup>                | 131.9(6) |
| O(5)-Cd(2)-O(4) <sup>#2</sup>                | 80.9(5)  | O(5) <sup>#2</sup> -Cd(2)-O(4) <sup>#2</sup> | 126.3(5) |
| O(3) <sup>#2</sup> -Cd(2)-O(4)               | 131.9(6) | O(3)-Cd(2)-O(4)                              | 51.7(6)  |
| O(5)-Cd(2)-O(4)                              | 126.3(5) | O(5) <sup>#2</sup> -Cd(2)-O(4)               | 80.9(5)  |
| O(4) <sup>#2</sup> -Cd(2)-O(4)               | 133.3(9) |                                              |          |

Symmetry transformations used to generate equivalent atoms: <sup>#1</sup> -x, -y, z; <sup>#2</sup> y, x, -z+1; <sup>#3</sup> -y+1/2, x-1/2, z; <sup>#4</sup> y+1/2, -x+1/2, z.

**Table S2** Selected bond distances (Å) and angles (°) for **2**.

|                                  |          |                                               |          |
|----------------------------------|----------|-----------------------------------------------|----------|
| Zn(1)- O(12)                     | 1.938(1) | Zn(1)-O(1W)                                   | 1.98(2)  |
| Zn(1)-O(9) <sup>#2</sup>         | 2.692    | Zn(1)-O(10) <sup>#2</sup>                     | 1.924(1) |
| Zn(1)-O(2) <sup>#2</sup>         | 1.974(1) | Zn(2)-O(11)                                   | 1.979(1) |
| Zn(2)-O(1)                       | 2.050(1) | Zn(2)-O(2W)                                   | 2.17(2)  |
| Zn(2)-O(3) <sup>#2</sup>         | 1.957(1) | Zn(2)-O(4) <sup>#2</sup>                      | 2.298(1) |
| Zn(3)-O(6) <sup>#4</sup>         | 1.892(1) | Zn(3)-O(14) <sup>#3</sup>                     | 1.968(1) |
| Zn(3)-O(8)                       | 2.099(1) | Zn(3)-O(3W)                                   | 2.17(4)  |
| Zn(3)- O(5) <sup>#4</sup>        | 2.683    | Zn(4)-O(13) <sup>#1</sup>                     | 2.011(9) |
| Zn(4)-O(15) <sup>#3</sup>        | 2.030(1) | Zn(4)-O(16) <sup>#3</sup>                     | 2.408(1) |
| Zn(4)- O(4W)                     | 2.04(2)  | Zn(4)- O(7)                                   | 1.983(1) |
| O(10) <sup>#2</sup> -Zn(1)-O(12) | 118.9(5) | O(10) <sup>#2</sup> -Zn(1)-O(2) <sup>#2</sup> | 132.0(5) |
| O(12)-Zn(1)-O(2) <sup>#2</sup>   | 100.9(6) | O(10) <sup>#2</sup> -Zn(1)-O(1W)              | 101.8(9) |
| O(12)-Zn(1)-O(1W)                | 95.7(10) | O(2) <sup>#2</sup> -Zn(1)-O(1W)               | 99.6(8)  |
| O(3) <sup>#2</sup> -Zn(2)-O(11)  | 135.8(5) | O(11)-Zn(2)-O(1)                              | 95.0(5)  |

|                                                |          |                                                |          |
|------------------------------------------------|----------|------------------------------------------------|----------|
| O(3) <sup>#2</sup> -Zn(2)-O(2W)                | 56.1(6)  | O(11)-Zn(2)-O(2W)                              | 103.6(8) |
| O(1)-Zn(2)-O(2W)                               | 94.9(7)  | O(3) <sup>#2</sup> -Zn(2)-O(4) <sup>#2</sup>   | 56.1(6)  |
| O(11)-Zn(2)-O(4) <sup>#2</sup>                 | 105.5(7) | O(1)-Zn(2)-O(4) <sup>#2</sup>                  | 95.2(5)  |
| O(2W)-Zn(2)-O(4) <sup>#2</sup>                 | 148.1(8) | O(6) <sup>#4</sup> -Zn(3)-O(14) <sup>#3</sup>  | 133.2(6) |
| O(6) <sup>#4</sup> -Zn(3)-O(8)                 | 122.0(6) | O(14) <sup>#3</sup> -Zn(3)-O(8)                | 94.2(6)  |
| O(6) <sup>#4</sup> -Zn(3)-O(3W)                | 99.2(1)  | O(14) <sup>#3</sup> -Zn(3)-O(3W)               | 100.0(1) |
| O(8)-Zn(3)-O(3W)                               | 103.3(1) | O(7)-Zn(4)-O(13) <sup>#1</sup>                 | 95.7(5)  |
| O(7)-Zn(4)-O(15) <sup>#3</sup>                 | 135.9(6) | O(13) <sup>#1</sup> -Zn(4)-O(15) <sup>#3</sup> | 123.4(6) |
| O(7)-Zn(4)-O(4W)                               | 98.9(9)  | O(13) <sup>#1</sup> -Zn(4)-O(4W)               | 101.4(9) |
| O(15) <sup>#3</sup> -Zn(4)-O(4W)               | 92.9(8)  | O(7)-Zn(4)-O(16) <sup>#3</sup>                 | 104.8(5) |
| O(13) <sup>#1</sup> -Zn(4)-O(16) <sup>#3</sup> | 101.1(5) | O(15) <sup>#3</sup> -Zn(4)-O(16) <sup>#3</sup> | 52.4(6)  |
| O(4W)-Zn(4)-O(16) <sup>#3</sup>                | 145.2(6) |                                                |          |

Symmetry transformations used to generate equivalent atoms: <sup>#1</sup> x-1/2, -y, z; <sup>#2</sup> x+1/2, -y, z; <sup>#3</sup> x, y-1, z; <sup>#4</sup> x+1/2, -y-1, z.

**Table S3** Selected bond distances (Å) and angles (°) for **3**.

|                           |          |                           |          |
|---------------------------|----------|---------------------------|----------|
| Mn(1)-O(10)               | 2.128(4) | Mn(1)-O(1)                | 2.130(4) |
| Mn(1)-O(1W)               | 2.213(4) | Mn(2)-O(3W)               | 2.075(5) |
| Mn(2)-O(2)                | 2.112(5) | Mn(2)-O(16) <sup>#2</sup> | 2.133(5) |
| Mn(2)-O(10)               | 2.186(4) | Mn(2)-O(2W)               | 2.223(8) |
| Mn(2)-O(9)                | 2.284(5) | Mn(3)-O(3)                | 2.090(5) |
| Mn(3)-O(15) <sup>#2</sup> | 2.102(5) | Mn(3)-O(3W)               | 2.155(6) |
| Mn(3)-O(7) <sup>#2</sup>  | 2.229(5) | Mn(3)-O(4W)               | 2.280(7) |
| Mn(3)-O(13) <sup>#2</sup> | 2.473(6) | Mn(4)-O(13) <sup>#2</sup> | 2.120(5) |
| Mn(4)-O(7) <sup>#2</sup>  | 2.158(5) | Mn(4)-O(12) <sup>#2</sup> | 2.164(5) |
| Mn(4)-O(5W)               | 2.164(4) | Mn(4)-O(4)                | 2.223(4) |
| Mn(4)-O(6) <sup>#3</sup>  | 2.257(5) | Mn(5)-O(7W)               | 2.131(9) |
| Mn(5)-O(8W)               | 2.179(7) | Mn(5)-O(4)                | 2.187(4) |
| Mn(5)-O(6W)               | 2.226(9) | Mn(5)-O(11) <sup>#3</sup> | 2.255(6) |

|                                                |           |                                                |           |
|------------------------------------------------|-----------|------------------------------------------------|-----------|
| Mn(5)-O(6) <sup>#3</sup>                       | 2.269(4)  | O(10) <sup>#1</sup> -Mn(1)-O(1)                | 91.07(1)  |
| O(10)-Mn(1)-O(1)                               | 88.93(1)  | O(10) <sup>#1</sup> -Mn(1)-O(1W)               | 87.48(1)  |
| O(10)-Mn(1)-O(1W)                              | 92.52(1)  | O(1)-Mn(1)-O(1W)                               | 88.9(2)   |
| O(1) <sup>#1</sup> -Mn(1)-O(1W)                | 91.1(2)   | O(3W)-Mn(2)-O(2)                               | 100.1(2)  |
| O(3W)-Mn(2)-O(16) <sup>#2</sup>                | 99.1(2)   | O(2)-Mn(2)-O(16) <sup>#2</sup>                 | 86.7(2)   |
| O(16) <sup>#2</sup> -Mn(2)-O(10)               | 86.57(1)  | O(3W)-Mn(2)-O(2W)                              | 90.3(4)   |
| O(2)-Mn(2)-O(2W)                               | 86.8(3)   | O(16) <sup>#2</sup> -Mn(2)-O(2W)               | 169.3(3)  |
| O(10)-Mn(2)-O(2W)                              | 86.1(3)   | O(3W)-Mn(2)-O(9)                               | 103.6(2)  |
| O(2)-Mn(2)-O(9)                                | 155.01(1) | O(16) <sup>#2</sup> -Mn(2)-O(9)                | 97.3(2)   |
| O(10)-Mn(2)-O(9)                               | 57.22(1)  | O(2W)-Mn(2)-O(9)                               | 85.3(3)   |
| O(3)-Mn(3)-O(15) <sup>#2</sup>                 | 170.9(2)  | O(3)-Mn(3)-O(3W)                               | 90.0(2)   |
| O(15) <sup>#2</sup> -Mn(3)-O(3W)               | 99.0(2)   | O(3)-Mn(3)-O(7) <sup>#2</sup>                  | 81.5(2)   |
| O(15) <sup>#2</sup> -Mn(3)-O(7) <sup>#2</sup>  | 90.97(1)  | O(3W)-Mn(3)-O(7) <sup>#2</sup>                 | 152.8(2)  |
| O(3)-Mn(3)-O(4W)                               | 89.5(2)   | O(15) <sup>#2</sup> -Mn(3)-O(4W)               | 90.3(2)   |
| O(3W)-Mn(3)-O(4W)                              | 82.7(2)   | O(7) <sup>#2</sup> -Mn(3)-O(4W)                | 122.7(2)  |
| O(3)-Mn(3)-O(13) <sup>#2</sup>                 | 84.4(2)   | O(15) <sup>#2</sup> -Mn(3)-O(13) <sup>#2</sup> | 98.15(1)  |
| O(3W)-Mn(3)-O(13) <sup>#2</sup>                | 82.4(2)   | O(7) <sup>#2</sup> -Mn(3)-O(13) <sup>#2</sup>  | 71.09(1)  |
| O(4W)-Mn(3)-O(13) <sup>#2</sup>                | 163.9(2)  | O(13) <sup>#2</sup> -Mn(4)-O(7) <sup>#2</sup>  | 79.67(1)  |
| O(13) <sup>#2</sup> -Mn(4)-O(12) <sup>#2</sup> | 89.01(1)  | O(7) <sup>#2</sup> -Mn(4)-O(12) <sup>#2</sup>  | 93.5(2)   |
| O(13) <sup>#2</sup> -Mn(4)-O(5W)               | 174.7(2)  | O(7) <sup>#2</sup> -Mn(4)-O(5W)                | 95.12(1)  |
| O(12) <sup>#2</sup> -Mn(4)-O(5W)               | 90.24(1)  | O(13) <sup>#2</sup> -Mn(4)-O(4)                | 100.12(1) |
| O(7) <sup>#2</sup> -Mn(4)-O(4)                 | 92.84(1)  | O(12) <sup>#2</sup> -Mn(4)-O(4)                | 169.68(1) |
| O(5W)-Mn(4)-O(4)                               | 81.11(1)  | O(13) <sup>#2</sup> -Mn(4)-O(6) <sup>#3</sup>  | 97.73(1)  |
| O(7) <sup>#2</sup> -Mn(4)-O(6) <sup>#3</sup>   | 169.24(1) | O(12) <sup>#2</sup> -Mn(4)-O(6) <sup>#3</sup>  | 96.87(1)  |
| O(5W)-Mn(4)-O(6) <sup>#3</sup>                 | 87.59(1)  | O(4)-Mn(4)-O(6) <sup>#3</sup>                  | 77.27(1)  |
| O(7W)-Mn(5)-O(8W)                              | 89.5(3)   | O(7W)-Mn(5)-O(4)                               | 170.5(3)  |
| O(8W)-Mn(5)-O(4)                               | 99.9(2)   | O(7W)-Mn(5)-O(6W)                              | 95.8(5)   |
| O(8W)-Mn(5)-O(6W)                              | 98.0(3)   | O(4)-Mn(5)-O(6W)                               | 81.3(3)   |
| O(7W)-Mn(5)-O(11) <sup>#3</sup>                | 92.5(4)   | O(8W)-Mn(5)-O(11) <sup>#3</sup>                | 87.5(3)   |

|                                               |          |                                 |          |
|-----------------------------------------------|----------|---------------------------------|----------|
| O(4)-Mn(5)-O(11) <sup>#3</sup>                | 89.58(1) | O(6W)-Mn(5)-O(11) <sup>#3</sup> | 170.0(4) |
| O(7W)-Mn(5)-O(6) <sup>#3</sup>                | 93.0(3)  | O(8W)-Mn(5)-O(6) <sup>#3</sup>  | 175.7(2) |
| O(4)-Mn(5)-O(6) <sup>#3</sup>                 | 77.74(1) | O(6W)-Mn(5)-O(6) <sup>#3</sup>  | 85.2(3)  |
| O(11) <sup>#3</sup> -Mn(5)-O(6) <sup>#3</sup> | 88.92(1) |                                 |          |

Symmetry transformations used to generate equivalent atoms: <sup>#1</sup> -x, -y+2, -z+1; <sup>#2</sup> x-1, y, z; <sup>#3</sup> -x, -y+2, -z; <sup>#4</sup> x+1, y, z.

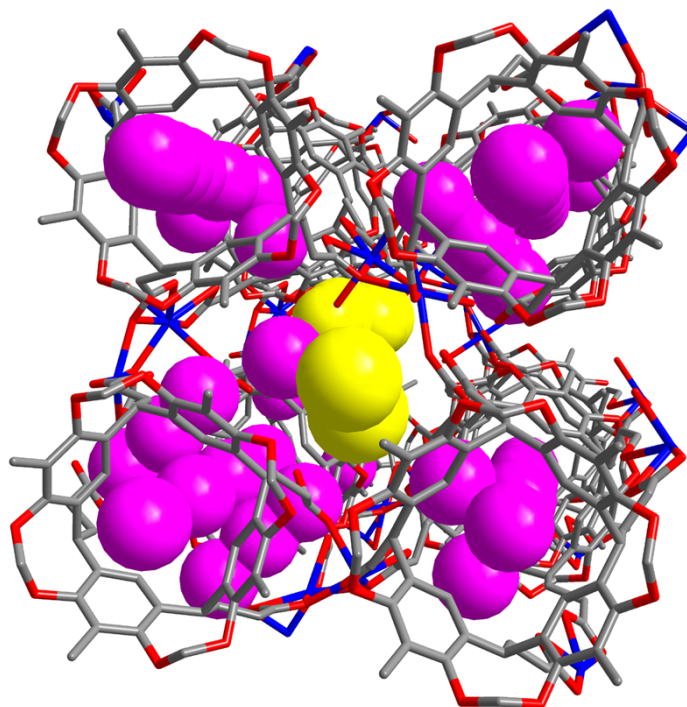

**Fig. S1** View of the channels of **1** on the top of cavities of the resorcin[4]arenes (pink and yellow balls represent water and DMF molecules respectively).

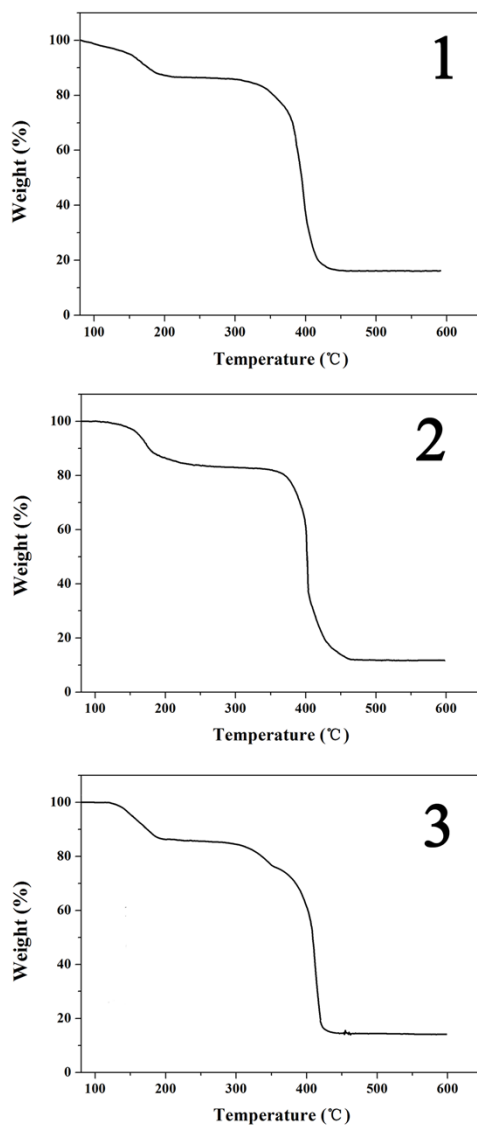

Fig. S2 Thermogravimetric curves of 1-3.

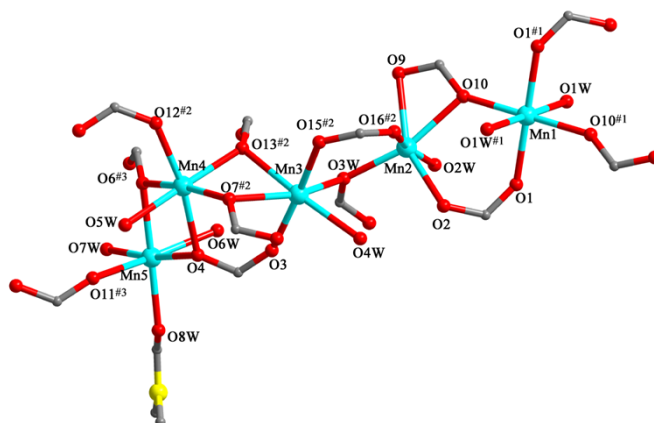

Fig. S3 Coordination environments of Mn(II) atoms in 3. Symmetry codes: #1  $-x, -y+2, -z+1$ ; #2  $x-1, y, z$ ; #3  $-x, -y+2, -z$ ; #4  $x+1, y, z$ .



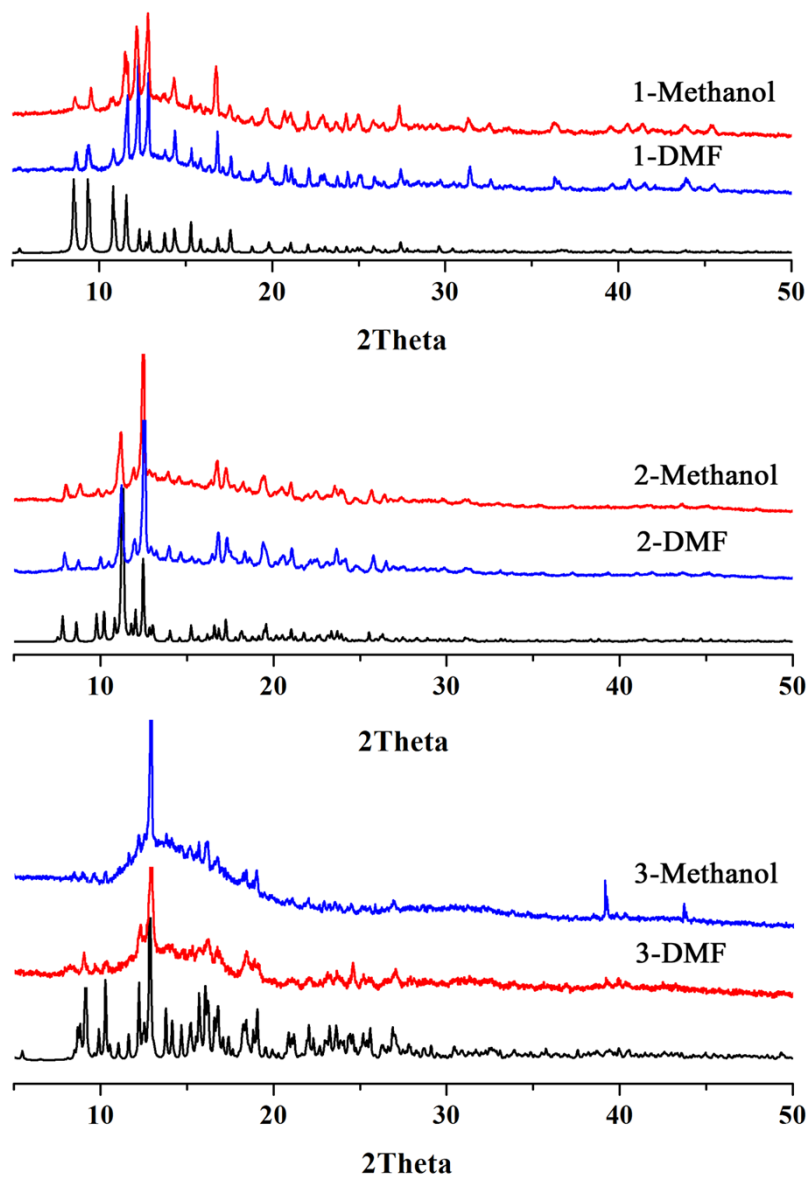

Fig. S4 PXR D patterns of **1-3** immersed in methanol (blue) and DMF (red) after one week.

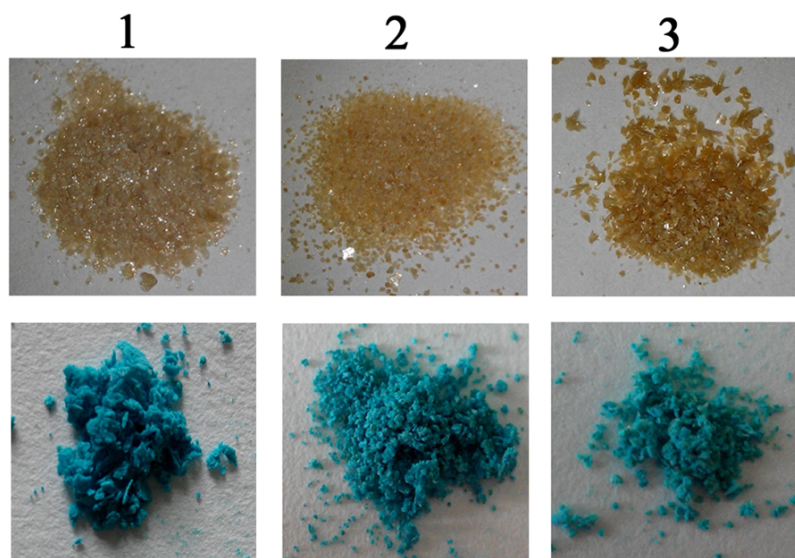

**Fig. S5** The photographs of **1-3** (up) and  $\text{Cu}^{2+}$ -exchanged samples **1a-3a** (down).

It is a pity that good-enough X-ray crystallographic data were not collected because of efflorescence of the samples. We can only obtain the cell parameters of **1a-3a**. Nevertheless, by comparing the data, we can see that the cell parameters of **1a-3a** were similar to their parent structures, respectively (Table S4).

**Table S4** Comparison of the crystal data of **1-1a**, **2-2a** and **3-3a**.

|                       | <b>1</b>   | <b>1a</b>  | <b>2</b>    | <b>2a</b> | <b>3</b>    | <b>3a</b> |
|-----------------------|------------|------------|-------------|-----------|-------------|-----------|
| $a$ (Å)               | 22.9973(4) | 22.91(4)   | 17.6923(7)  | 17.45(12) | 11.8811(6)  | 11.87(6)  |
| $b$ (Å)               | 22.9973(4) | 23.02(4)   | 15.6746(7)  | 15.86(11) | 20.9902(14) | 21.06(6)  |
| $c$ (Å)               | 22.5955(7) | 22.644(17) | 42.5940(11) | 42.51(19) | 21.3711(11) | 21.42(3)  |
|                       |            |            | )           |           |             |           |
| $\alpha$ (°)          | 90         | 90         | 90          | 90        | 79.558(5)   | 79.64(18) |
| $\beta$ (°)           | 90         | 90         | 90          | 90        | 81.534(4)   | 81.2(2)   |
| $\gamma$ (°)          | 90         | 90         | 90          | 90        | 86.360(5)   | 86.9(3)   |
| $V$ (Å <sup>3</sup> ) | 11950.2(6) | 11940(17)  | 11812.2(8)  | 11768(1)  | 5180.6(5)   | 5196(30)  |

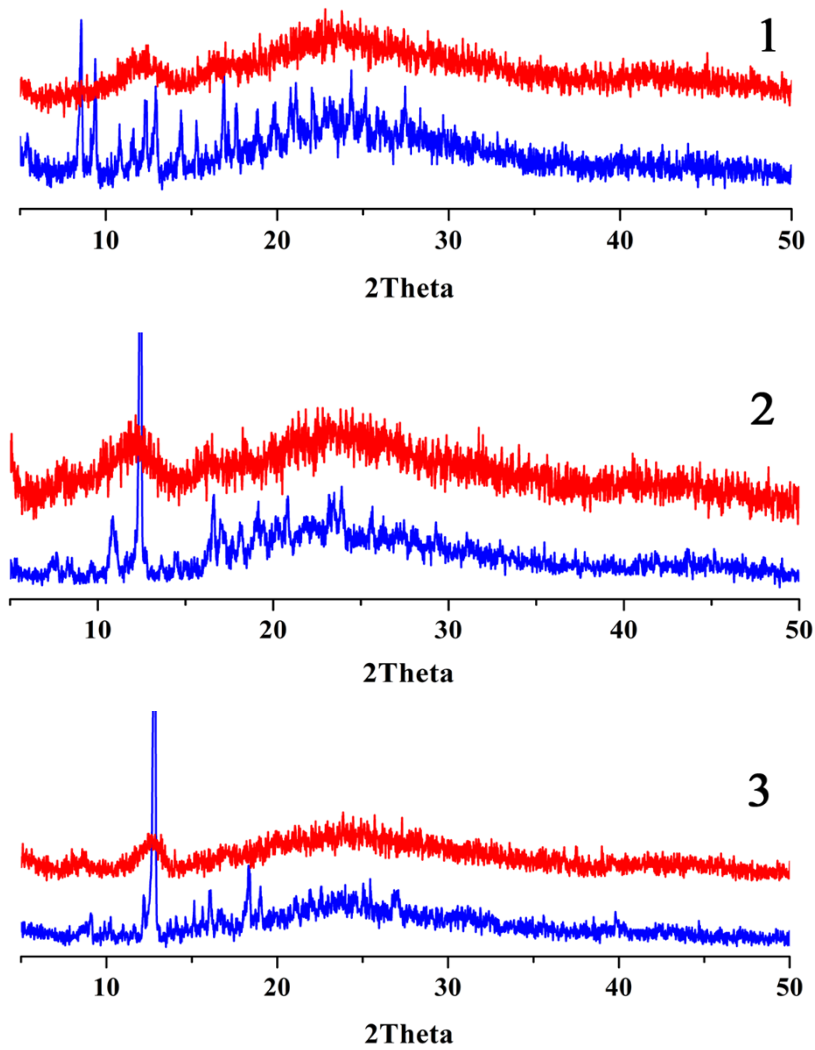

**Fig. S6** PXR D patterns: experimental (blue) and Cu(II) exchanged samples with the soaking time of 140, 140 and 200 minutes for **1-3**, respectively (red).

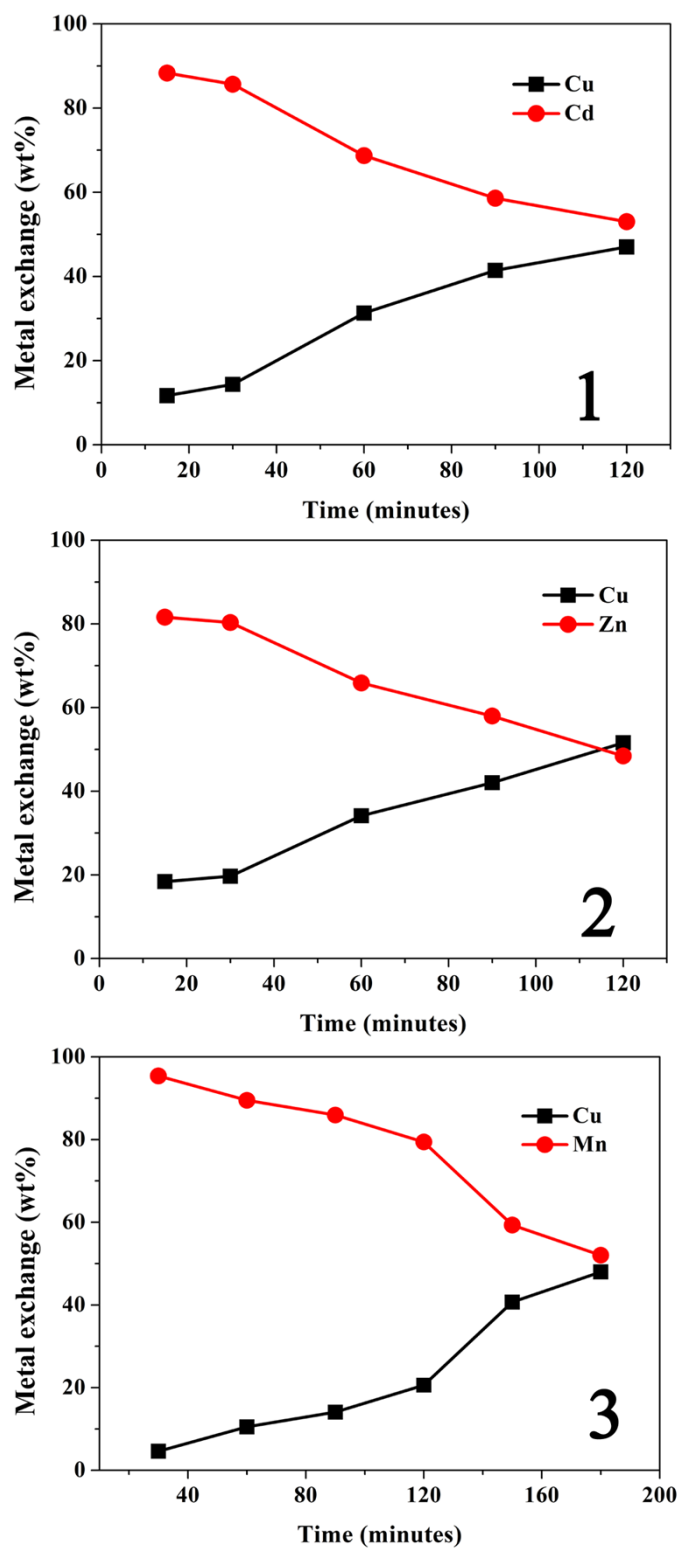

**Fig. S7** Time-dependent ICP data for the metal composition during the Cu(II) ion exchanging for 1-3.
